# Supplementary material for: Factors associated with severe COVID-19 in people with idiopathic inflammatory myopathy: results from the COVID-19 Global Rheumatology Alliance physician-reported registry
Source: HighWire-hosted journal article supplement (doi:10.1136/rmdopen-2022-002508), 2022-09-01
Supplement: rmdopen-2022-002508supp001_data_supplement.pdf [file rmdopen-2022-002508supp001_data_supplement.pdf]

**SUPPLEMENTARY TABLES**

| <b>Supplementary Table 1.</b> Breakdown of patients according to World Health Organisation (WHO) regions (N = 348) |              |
|--------------------------------------------------------------------------------------------------------------------|--------------|
| <b>WHO Regions</b>                                                                                                 | <b>n (%)</b> |
| <b>Region of the Americas</b>                                                                                      | 166 (47.7%)  |
| <u>North</u>                                                                                                       |              |
| Canada                                                                                                             | 4            |
| USA                                                                                                                | 99           |
| <u>South</u>                                                                                                       |              |
| Argentina                                                                                                          | 20           |
| Brazil                                                                                                             | 16           |
| Chile                                                                                                              | 3            |
| Dominican Republic                                                                                                 | 1            |
| Mexico                                                                                                             | 18           |
| Panama                                                                                                             | 1            |
| Paraguay                                                                                                           | 1            |
| Peru                                                                                                               | 3            |
| <b>South-East Asia</b>                                                                                             | 1 (0.3%)     |
| India                                                                                                              | 1            |
| <b>European</b>                                                                                                    | 162 (46.6%)  |
| Austria                                                                                                            | 1            |
| Belgium                                                                                                            | 2            |
| Croatia                                                                                                            | 5            |
| Czech Republic                                                                                                     | 14           |
| England                                                                                                            | 18           |
| France                                                                                                             | 34           |
| Germany                                                                                                            | 21           |
| Greece                                                                                                             | 5            |
| Israel                                                                                                             | 2            |
| Italy                                                                                                              | 19           |

|                              |                  |
|------------------------------|------------------|
| Latvia                       | 1                |
| Lithuania                    | 1                |
| Norway                       | 1                |
| Poland                       | 1                |
| Republic of Ireland          | 2                |
| Romania                      | 3                |
| Slovak Republic              | 5                |
| Spain                        | 4                |
| Sweden                       | 18               |
| Switzerland                  | 1                |
| Turkey                       | 3                |
| Ukraine                      | 1                |
| <b>Eastern Mediterranean</b> | <b>7 (2.0%)</b>  |
| Iran                         | 1                |
| Kuwait                       | 3                |
| Pakistan                     | 1                |
| Qatar                        | 2                |
| <b>Western Pacific</b>       | <b>11 (3.2%)</b> |
| Japan                        | 6                |
| Malaysia                     | 3                |
| Philippines                  | 2                |
| <b>Africa</b>                | <b>1 (0.3%)</b>  |
| Mozambique                   | 1                |

| <b>Supplementary Table 2.</b> Multivariable ordinal logistic regression analysis of factors associated with the 3-point ordinal COVID-19 severity outcome scale (no hospitalisation, hospitalisation, death), with comorbidities listed individually instead of comorbidity count (N = 348, secondary analysis) |                          |                  |
|-----------------------------------------------------------------------------------------------------------------------------------------------------------------------------------------------------------------------------------------------------------------------------------------------------------------|--------------------------|------------------|
|                                                                                                                                                                                                                                                                                                                 | <b>OR</b>                | <b>p-value</b>   |
| <b>Age (per decade)</b>                                                                                                                                                                                                                                                                                         | <b>1.65 (1.36-2.00)</b>  | <b>&lt;0.001</b> |
| <b>Male sex</b>                                                                                                                                                                                                                                                                                                 | <b>1.65 (1.01-2.71)</b>  | <b>0.044</b>     |
| <b>Region</b>                                                                                                                                                                                                                                                                                                   |                          |                  |
| Europe                                                                                                                                                                                                                                                                                                          | REF                      | n/a              |
| North America                                                                                                                                                                                                                                                                                                   | 0.91 (0.50-1.65)         | 0.757            |
| Other                                                                                                                                                                                                                                                                                                           | <b>4.33 (2.22-8.43)</b>  | <b>&lt;0.001</b> |
| <b>Pandemic calendar period</b>                                                                                                                                                                                                                                                                                 |                          |                  |
| On/before 15 June 2020                                                                                                                                                                                                                                                                                          | REF                      | n/a              |
| 16 June-30 September 2020                                                                                                                                                                                                                                                                                       | 0.57 (0.25-1.26)         | 0.162            |
| On/after 1 October 2020                                                                                                                                                                                                                                                                                         | <b>0.59 (0.35-0.97)</b>  | <b>0.039</b>     |
| <b>Comorbidities</b>                                                                                                                                                                                                                                                                                            |                          |                  |
| Hypertension or cardiovascular disease                                                                                                                                                                                                                                                                          | 1.24 (0.72-2.14)         | 0.428            |
| Interstitial lung disease                                                                                                                                                                                                                                                                                       | 1.42 (0.81-2.49)         | 0.220            |
| Diabetes                                                                                                                                                                                                                                                                                                        | 1.90 (0.95-3.79)         | 0.070            |
| Chronic renal disease                                                                                                                                                                                                                                                                                           | 1.23 (0.39-3.84)         | 0.721            |
| Cancer                                                                                                                                                                                                                                                                                                          | 1.03 (0.41-2.57)         | 0.947            |
| Obesity                                                                                                                                                                                                                                                                                                         | 0.95 (0.52-1.72)         | 0.854            |
| <b>Disease activity</b>                                                                                                                                                                                                                                                                                         |                          |                  |
| Remission                                                                                                                                                                                                                                                                                                       | REF                      | n/a              |
| Low/Moderate disease activity                                                                                                                                                                                                                                                                                   | 1.28 (0.59-2.39)         | 0.513            |
| High disease activity                                                                                                                                                                                                                                                                                           | <b>3.94 (1.25-12.36)</b> | <b>0.020</b>     |

|                                                                                                                                                                                                                                                                                                                                                                                                                                                                                                                                                              |                         |              |
|--------------------------------------------------------------------------------------------------------------------------------------------------------------------------------------------------------------------------------------------------------------------------------------------------------------------------------------------------------------------------------------------------------------------------------------------------------------------------------------------------------------------------------------------------------------|-------------------------|--------------|
| <b>Glucocorticoid (prednisolone-equivalent dose)</b>                                                                                                                                                                                                                                                                                                                                                                                                                                                                                                         |                         |              |
| No glucocorticoids                                                                                                                                                                                                                                                                                                                                                                                                                                                                                                                                           | REF                     | n/a          |
| >0 to 7.5mg/day                                                                                                                                                                                                                                                                                                                                                                                                                                                                                                                                              | 1.16 (0.61-2.69)        | 0.670        |
| >7.5mg/day                                                                                                                                                                                                                                                                                                                                                                                                                                                                                                                                                   | <b>2.89 (1.49-5.61)</b> | <b>0.002</b> |
| <b>IVIg</b>                                                                                                                                                                                                                                                                                                                                                                                                                                                                                                                                                  | 0.39 (0.25-5.66)        | 0.076        |
| <b>DMARD/immunosuppressant medication category</b>                                                                                                                                                                                                                                                                                                                                                                                                                                                                                                           |                         |              |
| csDMARD only (HCQ/MTX/SSZ/LEF monotherapy or combination therapy)                                                                                                                                                                                                                                                                                                                                                                                                                                                                                            | REF                     | n/a          |
| No DMARD/immunosuppressant                                                                                                                                                                                                                                                                                                                                                                                                                                                                                                                                   | 1.81 (0.88-3.71)        | 0.105        |
| AZA monotherapy                                                                                                                                                                                                                                                                                                                                                                                                                                                                                                                                              | 1.70 (0.68-4.26)        | 0.255        |
| MMF monotherapy                                                                                                                                                                                                                                                                                                                                                                                                                                                                                                                                              | 1.31 (0.56-3.10)        | 0.532        |
| AZA/MMF combination therapy (except combination with RTX or b/tsDMARDs)                                                                                                                                                                                                                                                                                                                                                                                                                                                                                      | 0.75 (0.26-2.11)        | 0.582        |
| CSA/CYC/TAC monotherapy or combination therapy (except RTX/b/tsDMARDs)                                                                                                                                                                                                                                                                                                                                                                                                                                                                                       | 1.44 (0.48-4.34)        | 0.519        |
| b/tsDMARD monotherapy or combination therapy (except RTX)                                                                                                                                                                                                                                                                                                                                                                                                                                                                                                    | 1.48 (0.43-5.04)        | 0.529        |
| RTX (monotherapy or combination therapy with any other drug)                                                                                                                                                                                                                                                                                                                                                                                                                                                                                                 | <b>2.66 (1.25-5.66)</b> | <b>0.011</b> |
| 95% CI, 95% confidence interval; AZA, azathioprine; bDMARD, biologic DMARD; CSA, ciclosporin; csDMARD, conventional synthetic DMARD; CYC, cyclophosphamide; DMARD, disease-modifying anti-rheumatic drug; HCQ, hydroxychloroquine; IVIg, intravenous immunoglobulin; LEF, leflunomide; MMF, mycophenolate mofetil; MTX, methotrexate; OR, odds ratio; RTX, rituximab; SSZ, sulfasalazine; TAC, tacrolimus; tsDMARD, targeted synthetic DMARD; IL, interleukin; TNF, tumour necrosis factor; JAKi, Janus kinase inhibitors; IVIg, intravenous immunoglobulin. |                         |              |

| <b>Supplementary Table 3.</b> Multivariable ordinal logistic regression analysis of factors associated with the 4-point ordinal COVID-19 severity outcome scale (no hospitalisation, hospitalisation with no oxygen, hospitalisation with oxygen/ventilation, death), with comorbidity count instead of comorbidities listed individually (N = 312, sensitivity analysis) |                          |                  |
|---------------------------------------------------------------------------------------------------------------------------------------------------------------------------------------------------------------------------------------------------------------------------------------------------------------------------------------------------------------------------|--------------------------|------------------|
|                                                                                                                                                                                                                                                                                                                                                                           | <b>OR</b>                | <b>p-value</b>   |
| <b>Age (per decade)</b>                                                                                                                                                                                                                                                                                                                                                   | <b>1.67 (1.37-2.04)</b>  | <b>&lt;0.001</b> |
| <b>Male gender</b>                                                                                                                                                                                                                                                                                                                                                        | <b>1.78 (1.05-3.00)</b>  | <b>0.032</b>     |
| <b>Region</b>                                                                                                                                                                                                                                                                                                                                                             |                          |                  |
| Europe                                                                                                                                                                                                                                                                                                                                                                    | REF                      | n/a              |
| North America                                                                                                                                                                                                                                                                                                                                                             | 0.94 (0.49-1.82)         | 0.858            |
| Other                                                                                                                                                                                                                                                                                                                                                                     | <b>4.04 (2.06-7.90)</b>  | <b>&lt;0.001</b> |
| <b>Pandemic calendar period</b>                                                                                                                                                                                                                                                                                                                                           |                          |                  |
| On/before 15 June 2020                                                                                                                                                                                                                                                                                                                                                    | REF                      | n/a              |
| 16 June-30 September 2020                                                                                                                                                                                                                                                                                                                                                 | 0.50 (0.22-1.11)         | 0.087            |
| On/after 1 October 2020                                                                                                                                                                                                                                                                                                                                                   | <b>0.51 (0.29-0.87)</b>  | <b>0.014</b>     |
| <b>Comorbidity count</b>                                                                                                                                                                                                                                                                                                                                                  |                          |                  |
| None                                                                                                                                                                                                                                                                                                                                                                      | REF                      | n/a              |
| One                                                                                                                                                                                                                                                                                                                                                                       | 1.21 (0.60-2.44)         | 0.600            |
| Two or more                                                                                                                                                                                                                                                                                                                                                               | <b>2.54 (1.31-4.95)</b>  | <b>0.006</b>     |
| <b>Disease activity</b>                                                                                                                                                                                                                                                                                                                                                   |                          |                  |
| Remission                                                                                                                                                                                                                                                                                                                                                                 | REF                      | n/a              |
| Low/moderate disease activity                                                                                                                                                                                                                                                                                                                                             | 1.25 (0.62-2.52)         | 0.522            |
| High disease activity                                                                                                                                                                                                                                                                                                                                                     | <b>4.82 (1.44-16.17)</b> | <b>0.011</b>     |
| <b>Glucocorticoid (prednisolone-equivalent dose)</b>                                                                                                                                                                                                                                                                                                                      |                          |                  |
| No glucocorticoids                                                                                                                                                                                                                                                                                                                                                        | REF                      | n/a              |

|                                                                                                                                                                                                                                                                                                                                                                                                                                                                                                                                                              |                         |              |
|--------------------------------------------------------------------------------------------------------------------------------------------------------------------------------------------------------------------------------------------------------------------------------------------------------------------------------------------------------------------------------------------------------------------------------------------------------------------------------------------------------------------------------------------------------------|-------------------------|--------------|
| >0 to 7.5mg/day                                                                                                                                                                                                                                                                                                                                                                                                                                                                                                                                              | 1.29 (0.66-2.53)        | 0.451        |
| >7.5mg/day                                                                                                                                                                                                                                                                                                                                                                                                                                                                                                                                                   | <b>2.60 (1.18-5.72)</b> | <b>0.018</b> |
| <b>IVIg</b>                                                                                                                                                                                                                                                                                                                                                                                                                                                                                                                                                  | 0.41 (0.13-1.28)        | 0.123        |
| <b>DMARD/immunosuppressant medication category</b>                                                                                                                                                                                                                                                                                                                                                                                                                                                                                                           |                         |              |
| csDMARD only (HCQ/MTX/SSZ/LEF monotherapy or combination therapy)                                                                                                                                                                                                                                                                                                                                                                                                                                                                                            | REF                     | n/a          |
| No DMARD/immunosuppressant                                                                                                                                                                                                                                                                                                                                                                                                                                                                                                                                   | 1.42 (0.65-3.09)        | 0.379        |
| AZA monotherapy                                                                                                                                                                                                                                                                                                                                                                                                                                                                                                                                              | 1.58 (0.61-4.09)        | 0.348        |
| MMF monotherapy                                                                                                                                                                                                                                                                                                                                                                                                                                                                                                                                              | 1.38 (0.59-3.22)        | 0.453        |
| AZA/MMF combination therapy (except combination with RTX or b/tsDMARDs)                                                                                                                                                                                                                                                                                                                                                                                                                                                                                      | 0.63 (0.22-1.84)        | 0.398        |
| CSA/CYC/TAC monotherapy or combination therapy (except RTX/b/tsDMARDs)                                                                                                                                                                                                                                                                                                                                                                                                                                                                                       | 1.07 (0.37-3.09)        | 0.907        |
| b/tsDMARD monotherapy or combination therapy (except RTX)                                                                                                                                                                                                                                                                                                                                                                                                                                                                                                    | 1.53 (0.43-5.40)        | 0.511        |
| RTX (monotherapy or combination therapy with any other drug)                                                                                                                                                                                                                                                                                                                                                                                                                                                                                                 | <b>2.33 (1.03-5.30)</b> | <b>0.043</b> |
| 95% CI, 95% confidence interval; AZA, azathioprine; bDMARD, biologic DMARD; CSA, ciclosporin; csDMARD, conventional synthetic DMARD; CYC, cyclophosphamide; DMARD, disease-modifying anti-rheumatic drug; HCQ, hydroxychloroquine; IVIg, intravenous immunoglobulin; LEF, leflunomide; MMF, mycophenolate mofetil; MTX, methotrexate; OR, odds ratio; RTX, rituximab; SSZ, sulfasalazine; TAC, tacrolimus; tsDMARD, targeted synthetic DMARD; IL, interleukin; TNF, tumour necrosis factor; JAKi, Janus kinase inhibitors; IVIg, intravenous immunoglobulin. |                         |              |

| <b>Supplementary Table 4.</b> Multivariable ordinal logistic regression analysis of factors associated with the 4-point ordinal COVID-19 severity outcome scale (no hospitalisation, hospitalisation with no oxygen, hospitalisation with oxygen/ventilation, death), with comorbidities listed individually instead of comorbidity count (N = 312, sensitivity analysis) |                         |                  |
|---------------------------------------------------------------------------------------------------------------------------------------------------------------------------------------------------------------------------------------------------------------------------------------------------------------------------------------------------------------------------|-------------------------|------------------|
|                                                                                                                                                                                                                                                                                                                                                                           | <b>OR</b>               | <b>p-value</b>   |
| <b>Age (per decade)</b>                                                                                                                                                                                                                                                                                                                                                   | <b>1.70 (1.39-2.08)</b> | <b>&lt;0.001</b> |
| <b>Male gender</b>                                                                                                                                                                                                                                                                                                                                                        | <b>1.83 (1.07-3.13)</b> | <b>0.027</b>     |
| <b>Region</b>                                                                                                                                                                                                                                                                                                                                                             |                         |                  |
| Europe                                                                                                                                                                                                                                                                                                                                                                    | REF                     | n/a              |
| North America                                                                                                                                                                                                                                                                                                                                                             | 0.91 (0.46-1.79)        | 0.791            |
| Other                                                                                                                                                                                                                                                                                                                                                                     | <b>3.83 (1.94-7.57)</b> | <b>&lt;0.001</b> |
| <b>Pandemic calendar period</b>                                                                                                                                                                                                                                                                                                                                           |                         |                  |
| On/Before 15 June 2020                                                                                                                                                                                                                                                                                                                                                    | REF                     | n/a              |
| 16 June-30 September 2020                                                                                                                                                                                                                                                                                                                                                 | 0.56 (0.24-1.27)        | 0.164            |
| On/after 1 October 2020                                                                                                                                                                                                                                                                                                                                                   | <b>0.52 (0.30-0.90)</b> | <b>0.021</b>     |
| <b>Co-morbidities</b>                                                                                                                                                                                                                                                                                                                                                     |                         |                  |
| Hypertension or cardiovascular disease                                                                                                                                                                                                                                                                                                                                    | 1.48 (0.85-2.60)        | 0.167            |
| Interstitial lung disease                                                                                                                                                                                                                                                                                                                                                 | 1.29 (0.72-2.31)        | 0.393            |
| Diabetes                                                                                                                                                                                                                                                                                                                                                                  | 2.08 (1.00-4.33)        | 0.051            |
| Chronic renal disease                                                                                                                                                                                                                                                                                                                                                     | 1.80 (0.50-6.46)        | 0.366            |
| Cancer                                                                                                                                                                                                                                                                                                                                                                    | 0.78 (0.28-2.16)        | 0.635            |
| Obesity                                                                                                                                                                                                                                                                                                                                                                   | 0.91 (0.48-1.74)        | 0.786            |
| <b>Disease activity</b>                                                                                                                                                                                                                                                                                                                                                   |                         |                  |
| Remission                                                                                                                                                                                                                                                                                                                                                                 | REF                     | n/a              |
| Low/moderate disease activity                                                                                                                                                                                                                                                                                                                                             | 1.22 (0.60-2.50)        | 0.578            |

|                                                                                                                                                                                                                                                                                                                                                                                                                                                                                                                                                              |                          |              |
|--------------------------------------------------------------------------------------------------------------------------------------------------------------------------------------------------------------------------------------------------------------------------------------------------------------------------------------------------------------------------------------------------------------------------------------------------------------------------------------------------------------------------------------------------------------|--------------------------|--------------|
| High disease activity                                                                                                                                                                                                                                                                                                                                                                                                                                                                                                                                        | <b>5.38 (1.44-20.03)</b> | <b>0.013</b> |
| <b>Glucocorticoid (prednisolone-equivalent dose)</b>                                                                                                                                                                                                                                                                                                                                                                                                                                                                                                         |                          |              |
| No glucocorticoids                                                                                                                                                                                                                                                                                                                                                                                                                                                                                                                                           | REF                      | n/a          |
| >0 to 7.5mg/day                                                                                                                                                                                                                                                                                                                                                                                                                                                                                                                                              | 1.42 (0.69-2.94)         | 0.340        |
| >7.5mg/day                                                                                                                                                                                                                                                                                                                                                                                                                                                                                                                                                   | <b>3.09 (1.50-6.34)</b>  | <b>0.002</b> |
| <b>IVIg</b>                                                                                                                                                                                                                                                                                                                                                                                                                                                                                                                                                  | 0.38 (0.12-1.22)         | 0.103        |
| <b>DMARD/immunosuppressant medication category</b>                                                                                                                                                                                                                                                                                                                                                                                                                                                                                                           |                          |              |
| csDMARD only (HCQ/MTX/SSZ/LEF monotherapy or combination therapy)                                                                                                                                                                                                                                                                                                                                                                                                                                                                                            | REF                      | n/a          |
| No DMARD/immunosuppressant                                                                                                                                                                                                                                                                                                                                                                                                                                                                                                                                   | 1.38 (0.63-3.02)         | 0.414        |
| AZA monotherapy                                                                                                                                                                                                                                                                                                                                                                                                                                                                                                                                              | 1.39 (0.53-3.65)         | 0.508        |
| MMF monotherapy                                                                                                                                                                                                                                                                                                                                                                                                                                                                                                                                              | 1.65 (0.69-3.96)         | 0.262        |
| AZA/MMF combination therapy (except combination with RTX or b/tsDMARDs)                                                                                                                                                                                                                                                                                                                                                                                                                                                                                      | 0.59 (0.20-1.75)         | 0.341        |
| CSA/CYC/TAC monotherapy or combination therapy (except RTX/b/tsDMARDs)                                                                                                                                                                                                                                                                                                                                                                                                                                                                                       | 1.07 (0.35 –3.25)        | 0.910        |
| b/tsDMARD monotherapy or combination therapy (except RTX)                                                                                                                                                                                                                                                                                                                                                                                                                                                                                                    | 1.35 (0.37-4.97)         | 0.646        |
| RTX (monotherapy or combination therapy with any other drug)                                                                                                                                                                                                                                                                                                                                                                                                                                                                                                 | <b>2.59 (1.11-6.06)</b>  | <b>0.029</b> |
| 95% CI, 95% confidence interval; AZA, azathioprine; bDMARD, biologic DMARD; CSA, ciclosporin; csDMARD, conventional synthetic DMARD; CYC, cyclophosphamide; DMARD, disease-modifying anti-rheumatic drug; HCQ, hydroxychloroquine; IVIg, intravenous immunoglobulin; LEF, leflunomide; MMF, mycophenolate mofetil; MTX, methotrexate; OR, odds ratio; RTX, rituximab; SSZ, sulfasalazine; TAC, tacrolimus; tsDMARD, targeted synthetic DMARD; IL, interleukin; TNF, tumour necrosis factor; JAKi, Janus kinase inhibitors; IVIg, intravenous immunoglobulin. |                          |              |
